# Supplementary material
Source: PubMed Central journal article supplement (PMC4380774)

# Figure S5

Figure 1

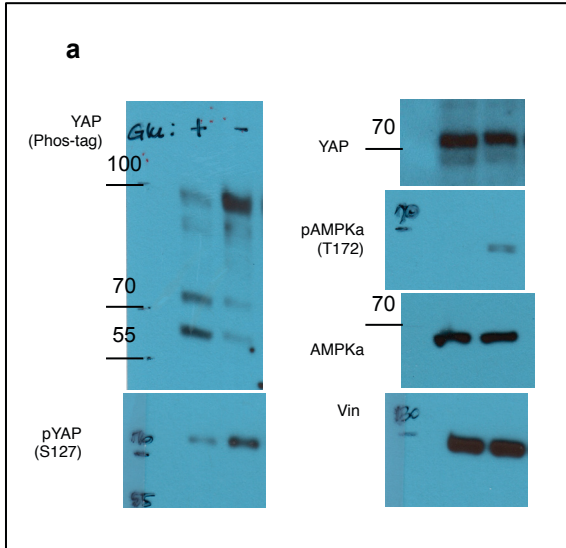

Figure 1

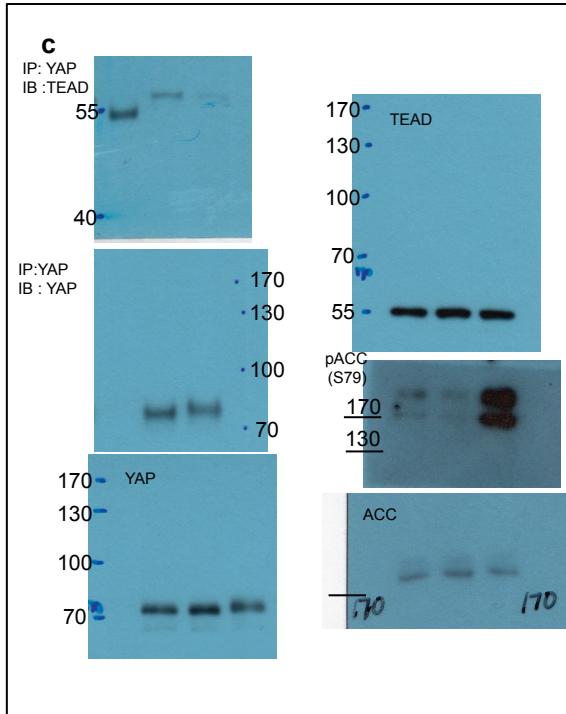

Figure 1

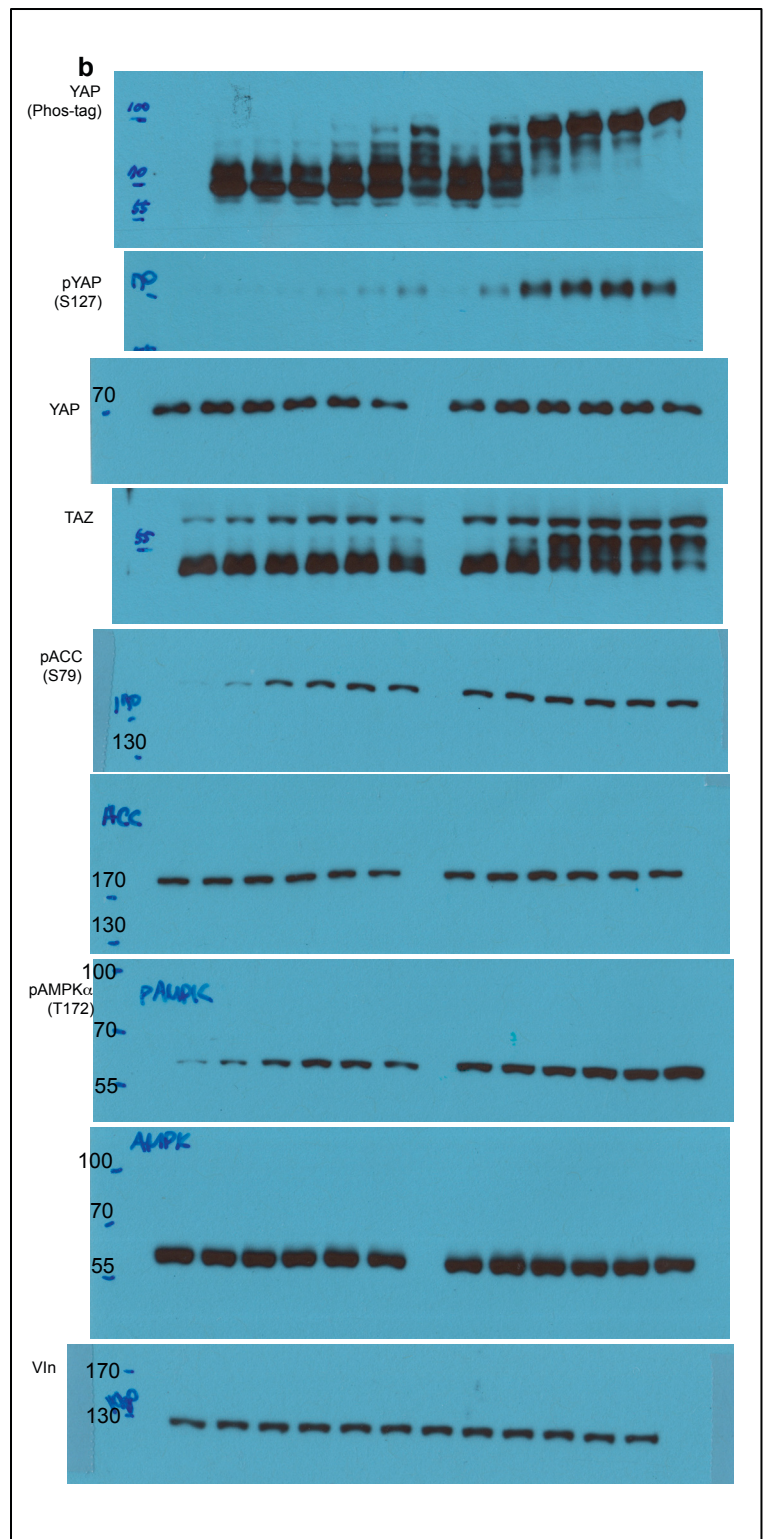

Figure S5

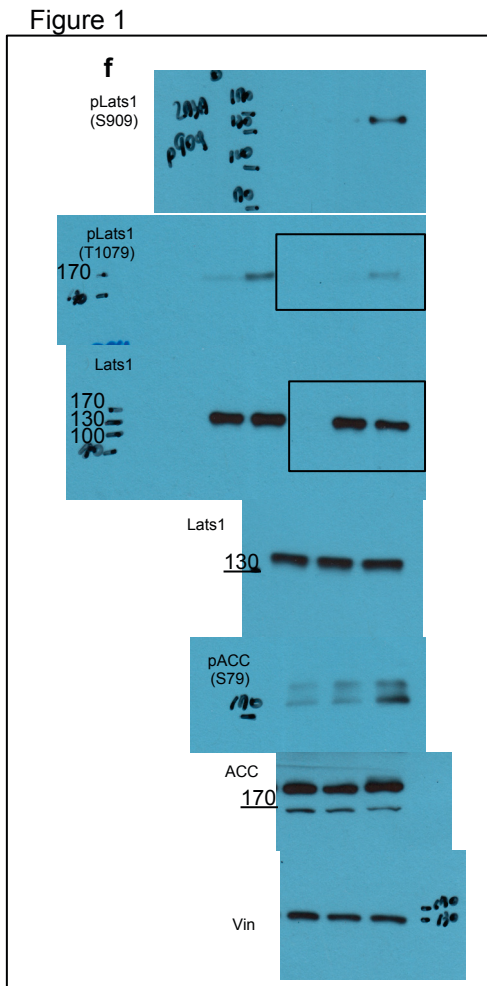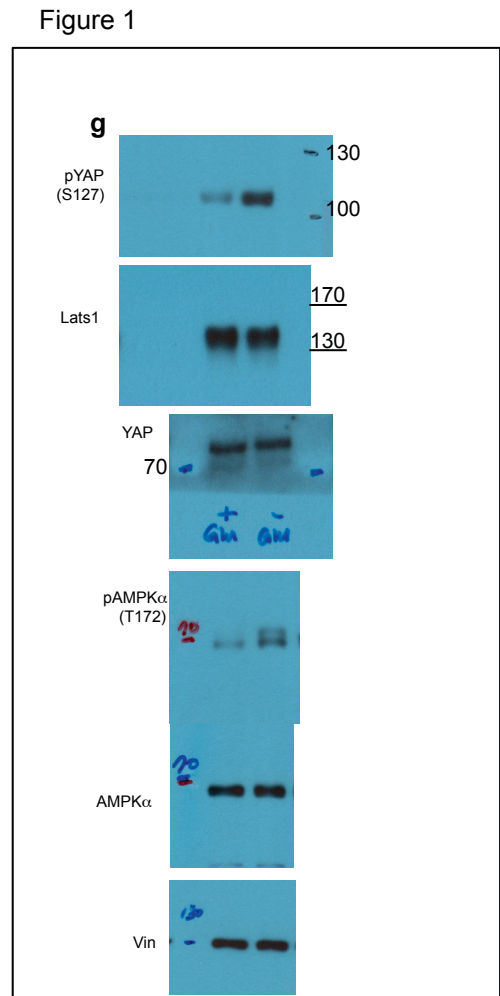

Figure 2

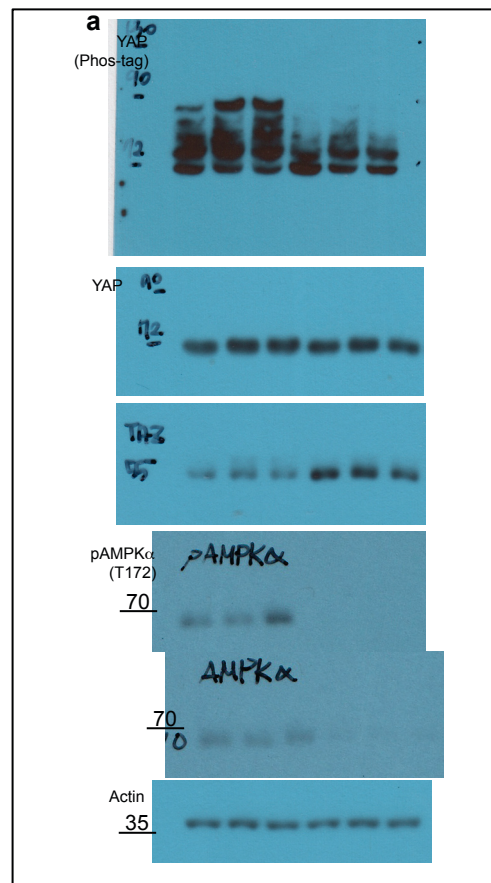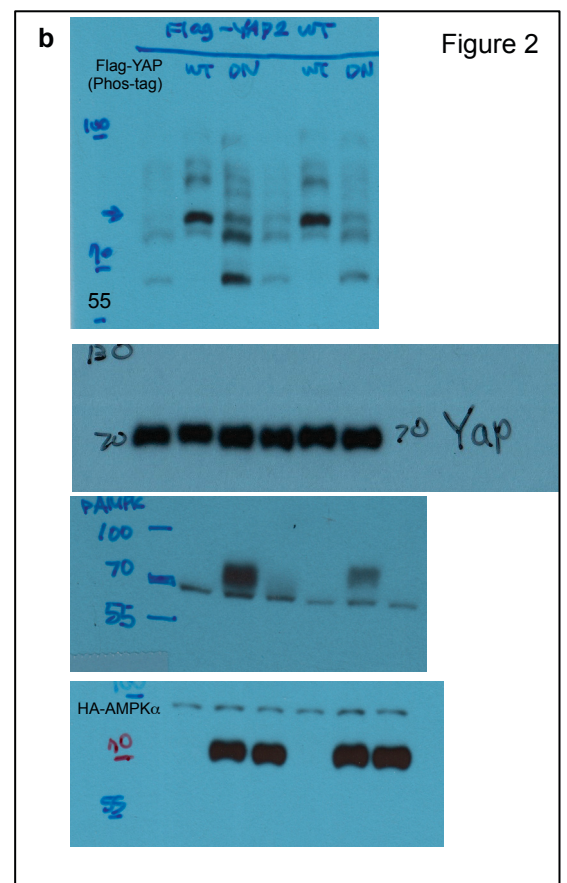



# Figure S5

Figure 2

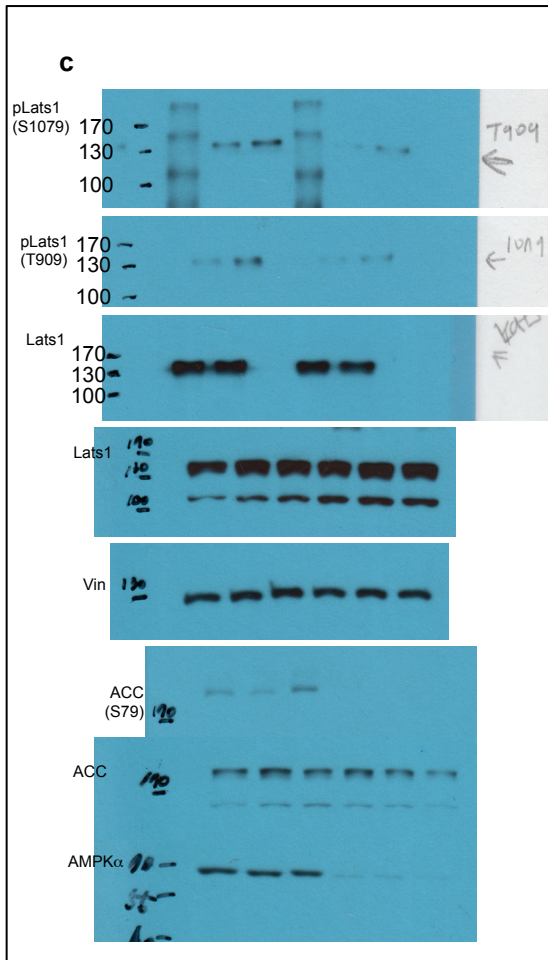

Figure 2

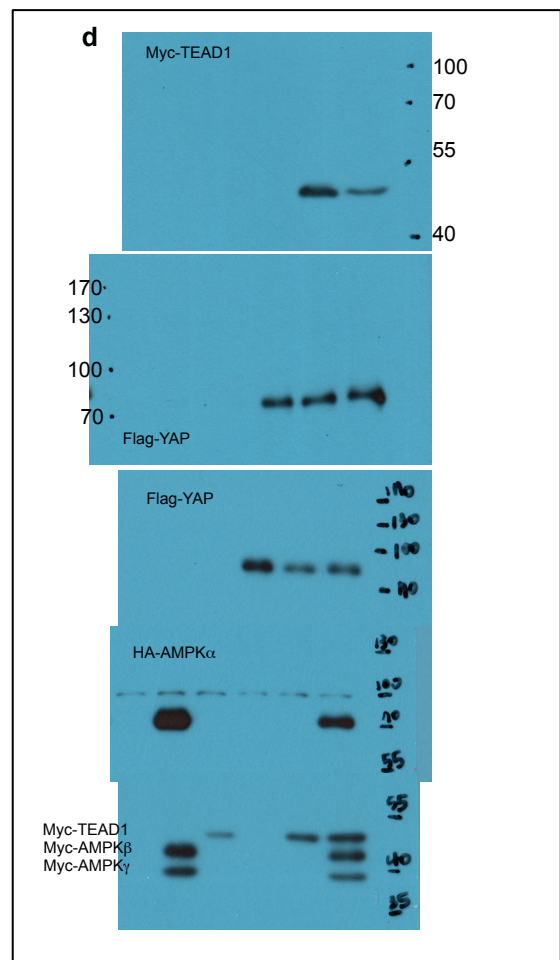

Figure 2 f

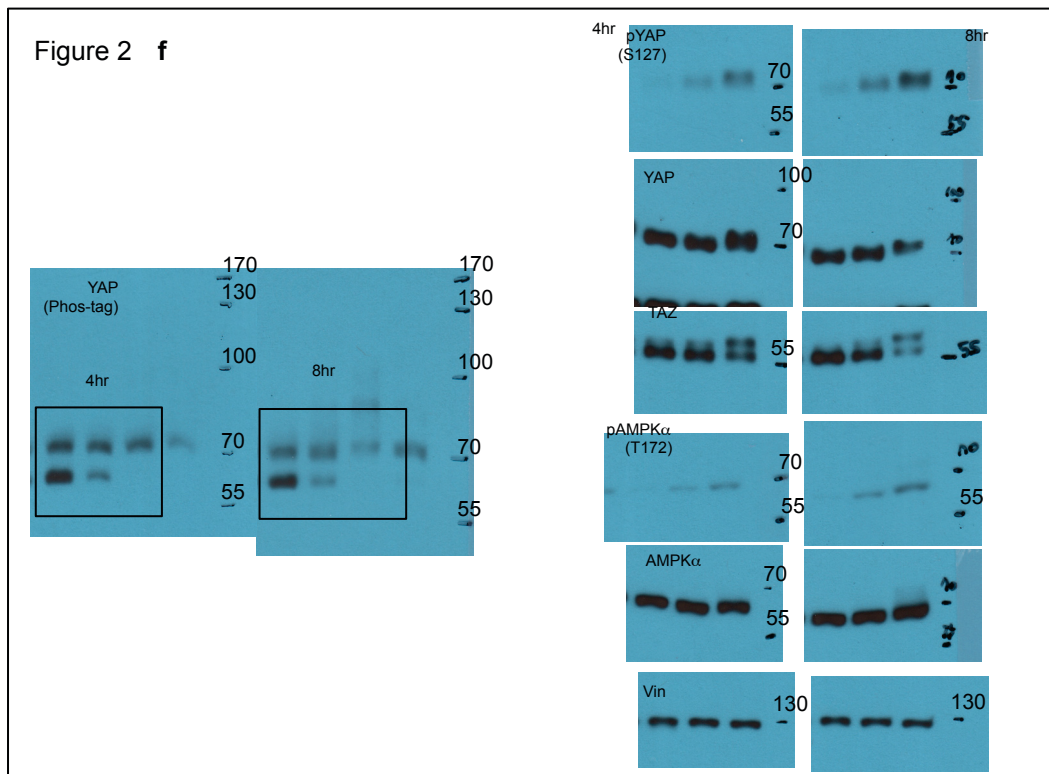

**Figure S5**

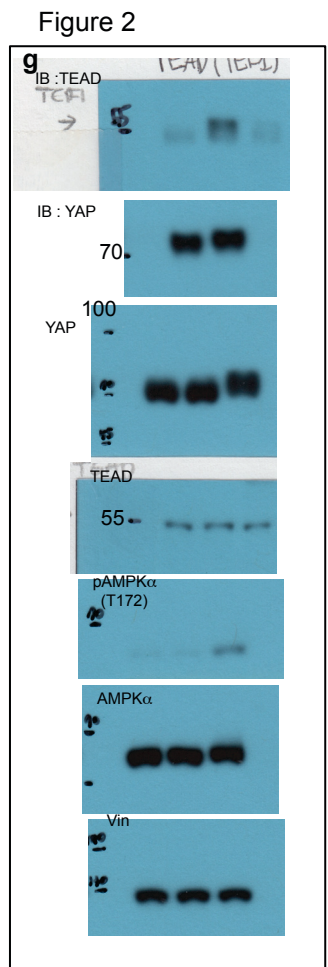

**Figure 3**

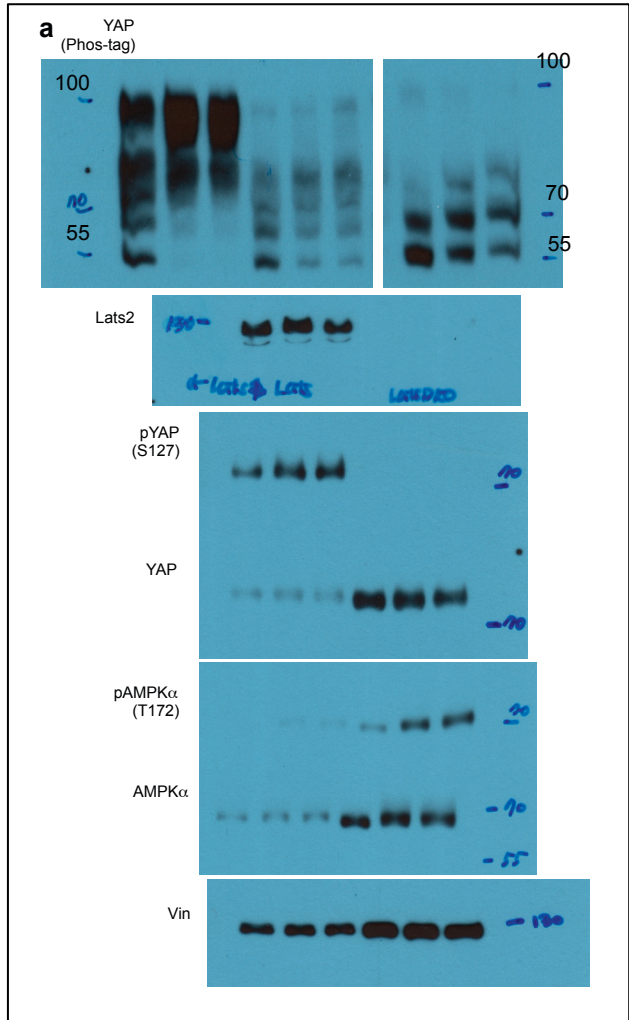

**Figure 3 b**

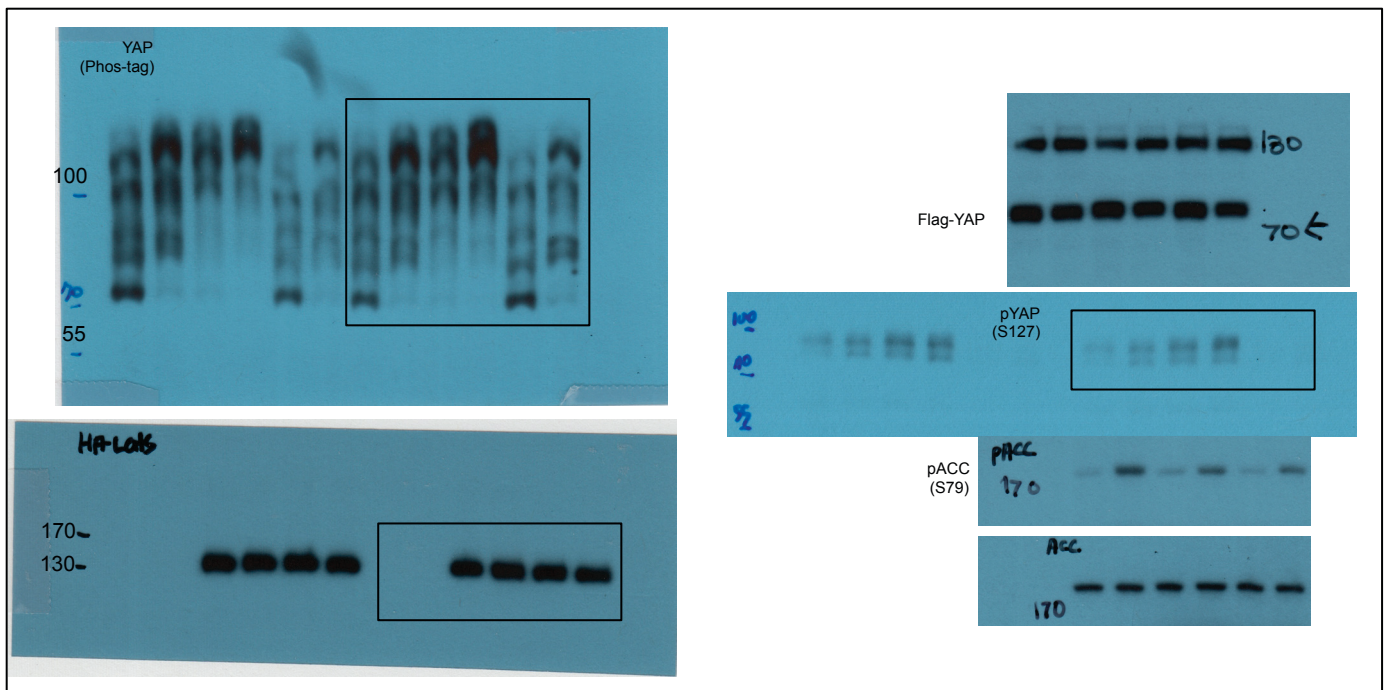



**Figure S5**

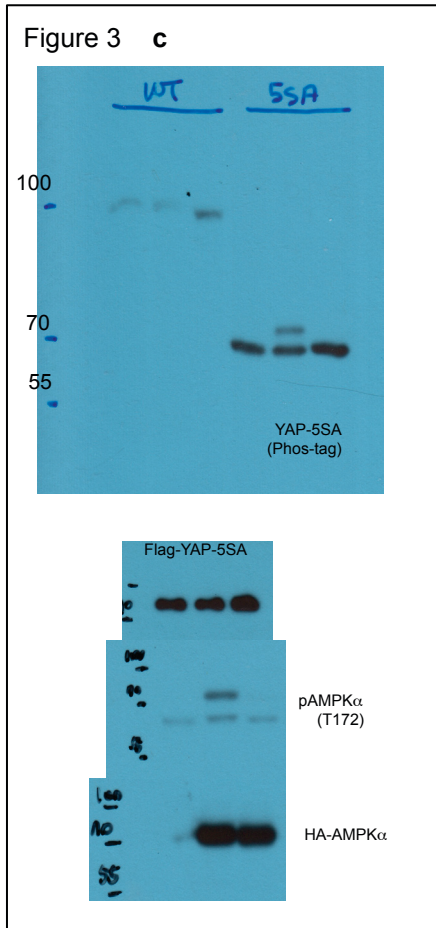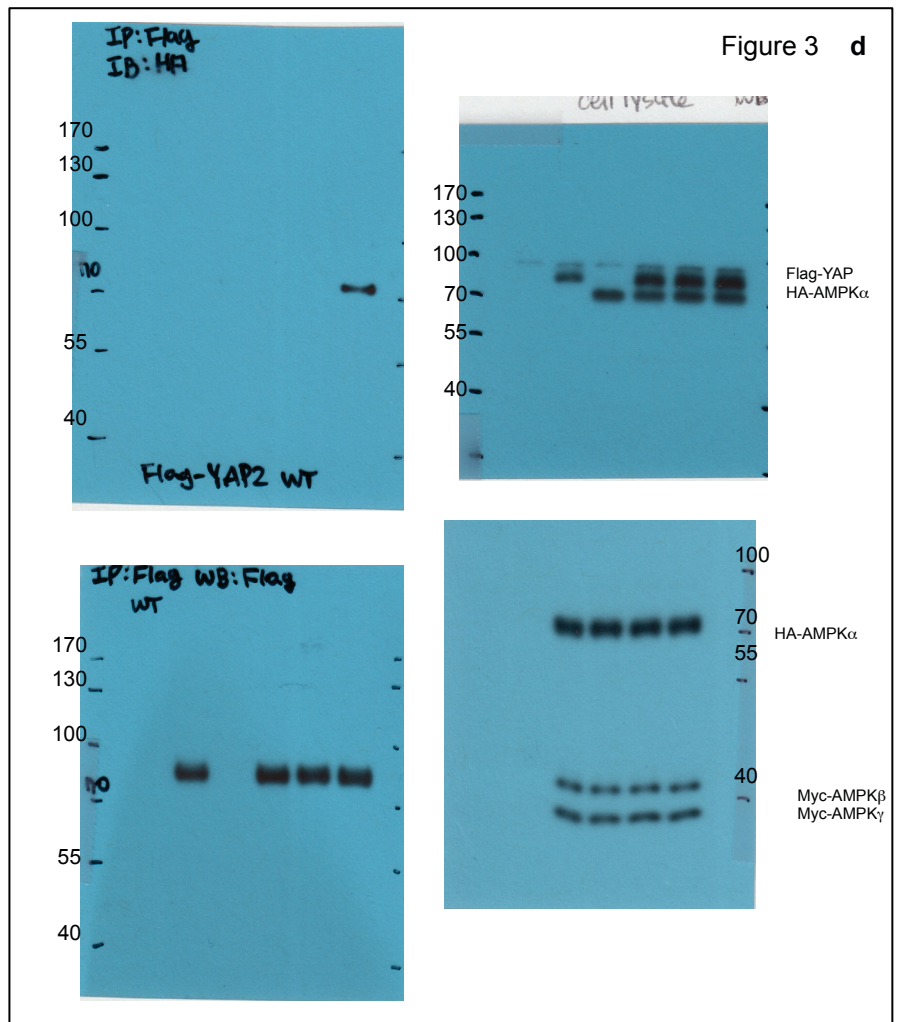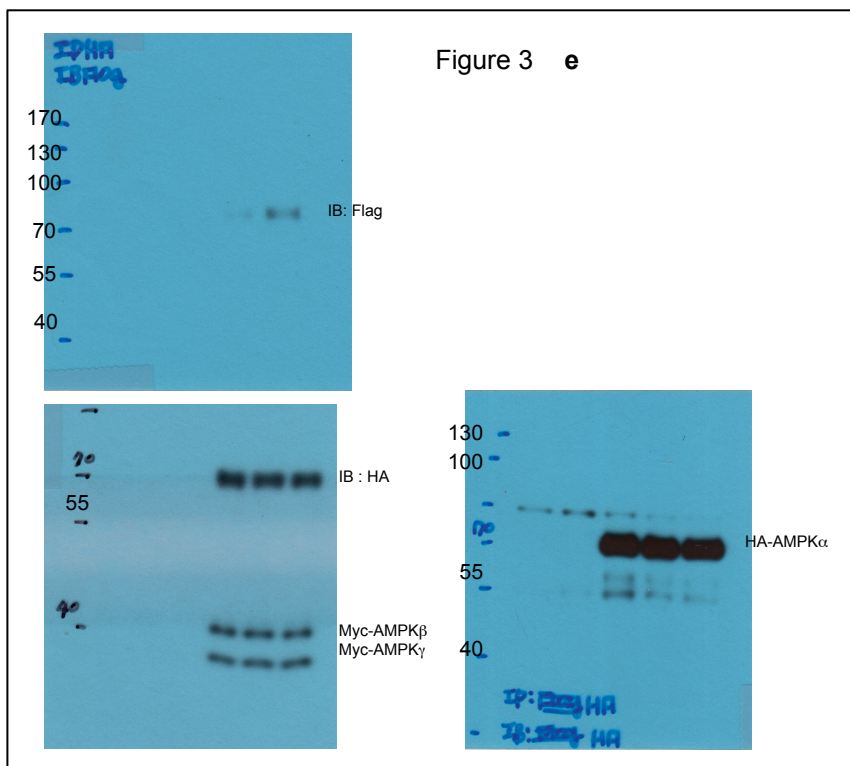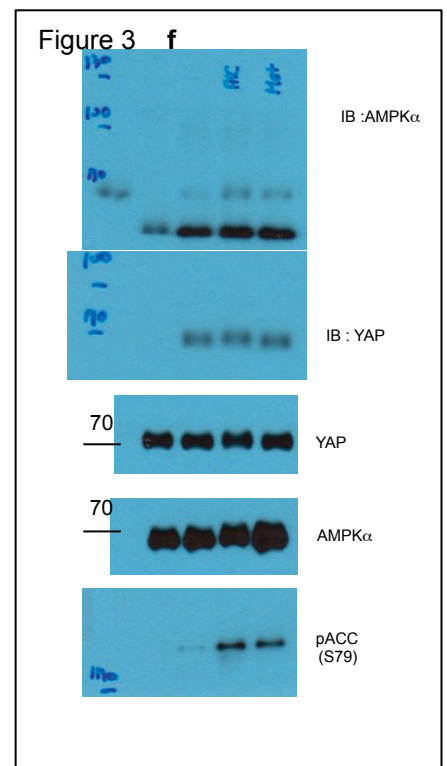

**Figure S5**

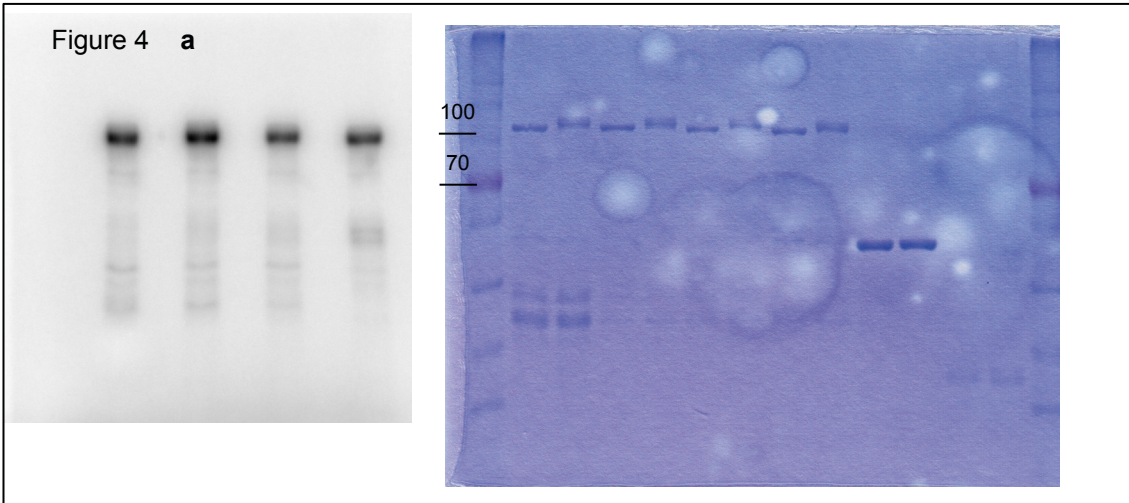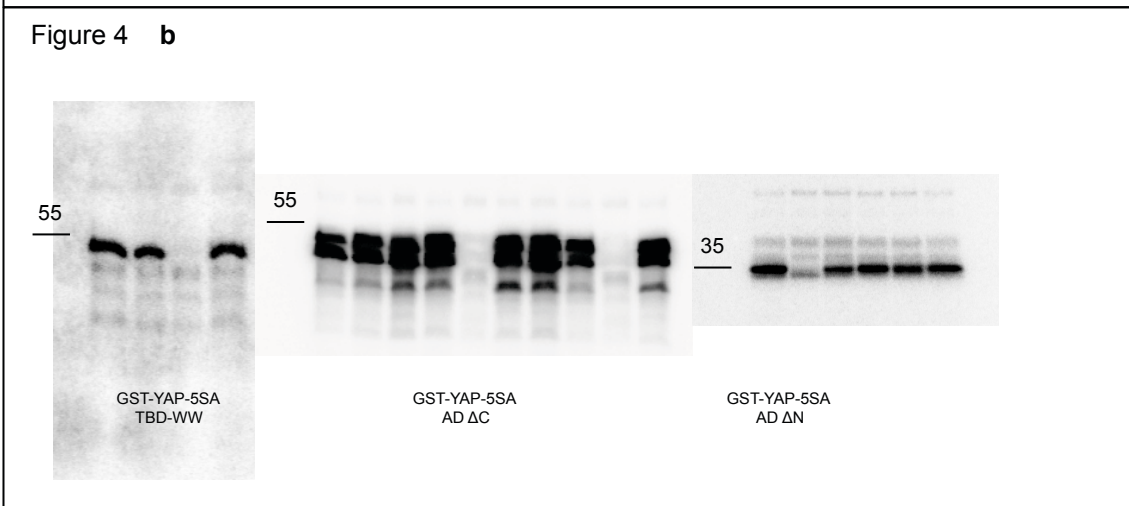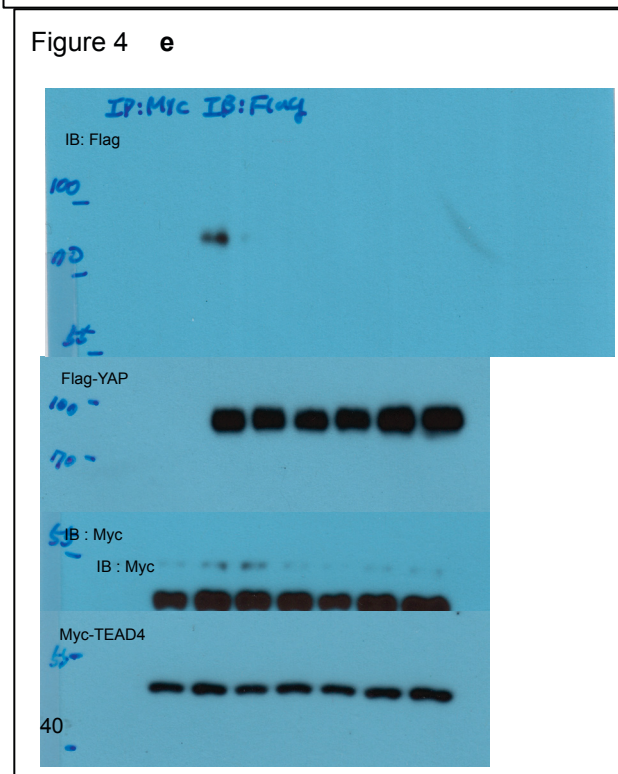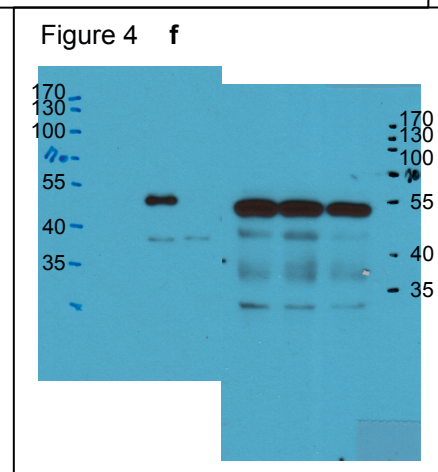

# Figure S5

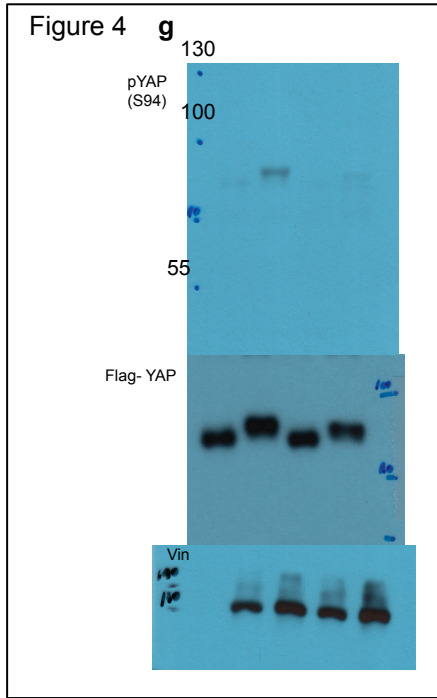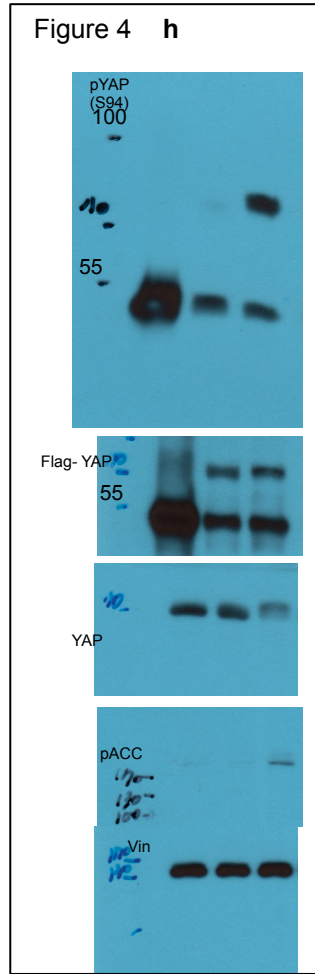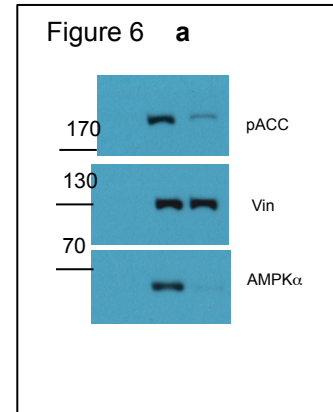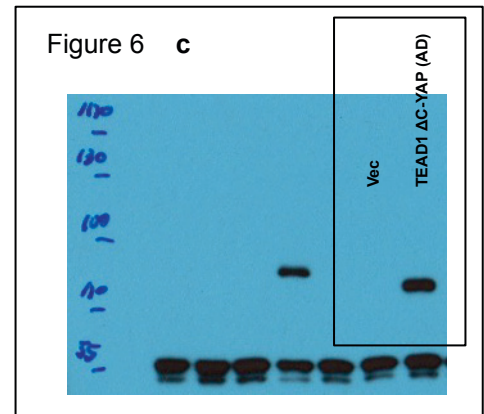

Supplement: NIHMS656226-supplement-6.pdf [file NIHMS656226-supplement-6.pdf]
