# Supplementary material
Source: PubMed Central journal article supplement (PMC4380774)

# Figure S4

**a**

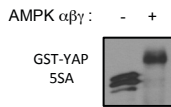

**c**

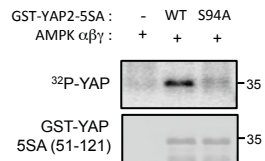

**b**

■ : Amino acid coverage by mass spectrometry ■ : High confidence (99%-100%) ■ : Low confidence (75%-99%)

```

MDPGQO83PPQ94PAPOGOGOPPSOP156POGOGPPSGPGOPAPAATQAAPQAPPAGHQIV
HVRGDAETDLEALFNAVMPKKTANVPO83IVPMRLRKL94PD156SFFKPPEPKSHSRQAAT
DAGTAGALTPQHVRAHASPASLOLGAVSPGTLTPTGVVSGPAATP156IAOHLROSAF
EIPDDVPLPAGWEMAKTSSGQRYFLNHIDQTTTWDPRKAMLSQMNV156TAPTSPPV
QONMMNSASG156PLPDGWEQAMTODGEIYYINHK156NKTT156SWLDPRLDPRFAMNQRISO
SAPVKOP156PLAPOSPOGGVMGGSNS156NOQQO156MRLOOLOMEKERLRLK156QOELLROEL
ALRSQ156LPTLEODGGTQNPV350SPGMSQELRTMTTNS366SDPFLNSGTYHSRDEATDSG
LSMS390S392Y392VPRT392PDDFLNSVD392EMDTGDTINOST416LP416SQONRFPDYLEAIPGTNVDLG
TLEGDGMNIEGEELMPSLQ463EAL464SS464DI464LNDMESVLAATKLDKE483S486FL486T486WL
    
```

**d**

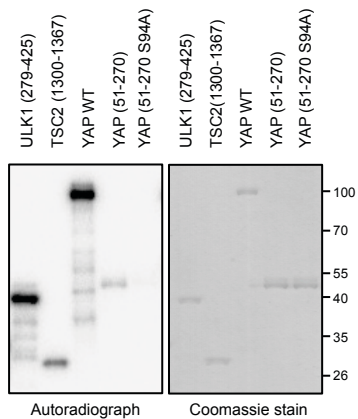

**e**

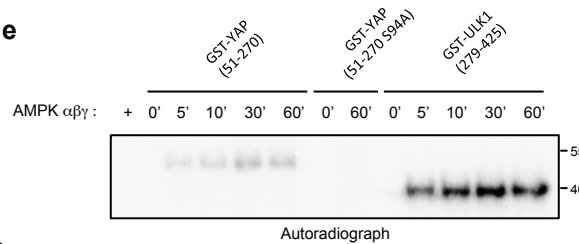

**f**

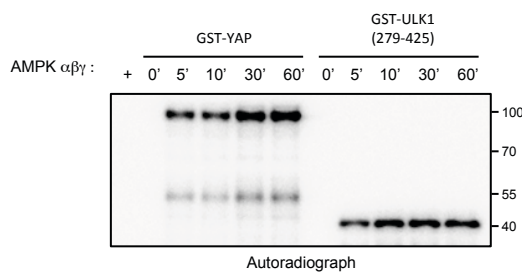

**g**

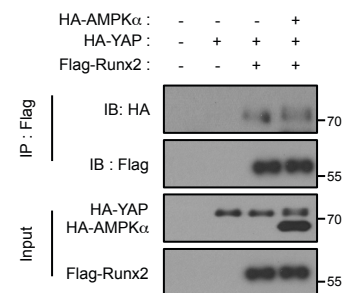

Supplement: NIHMS656226-supplement-5.pdf [file NIHMS656226-supplement-5.pdf]
