# Supplementary material
Source: PubMed Central journal article supplement (PMC4380774)

# Figure S1

**a**

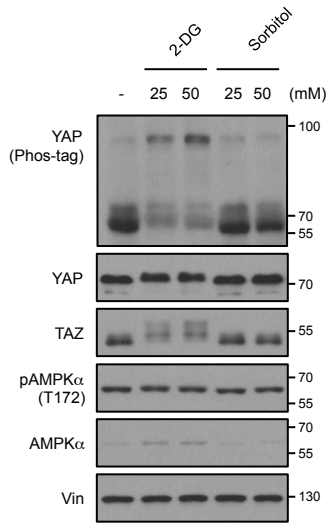

**b**

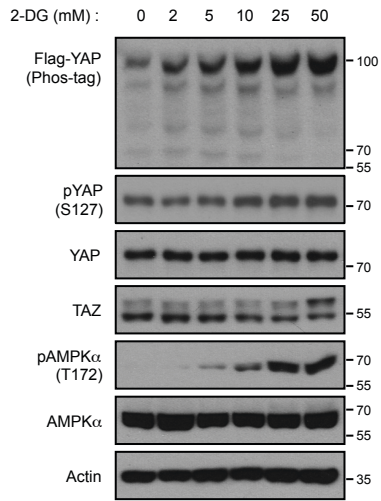

**c**

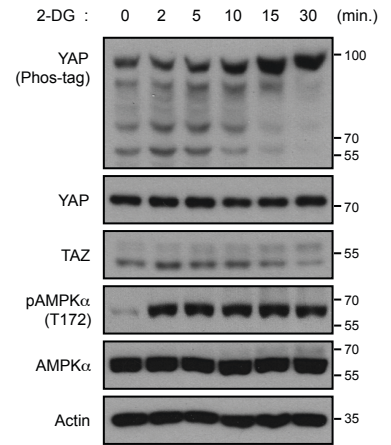

**d**

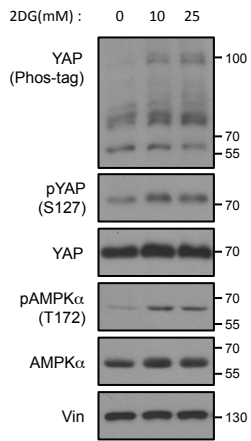

**e**

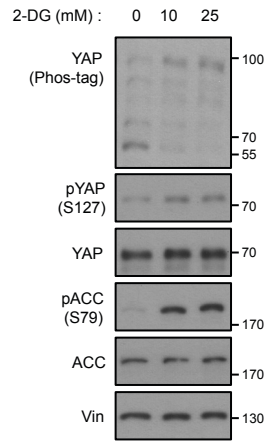

**f**

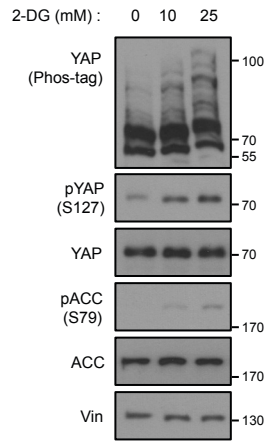

**g**

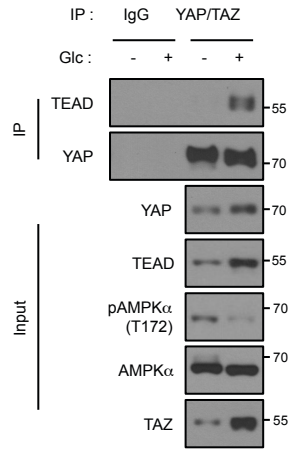

Supplement: NIHMS656226-supplement-2.pdf [file NIHMS656226-supplement-2.pdf]

# Figure S2

**a**

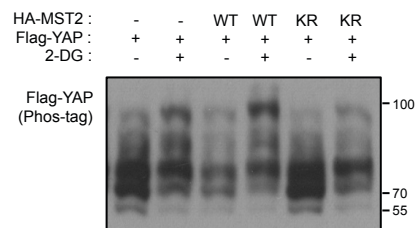

**b**

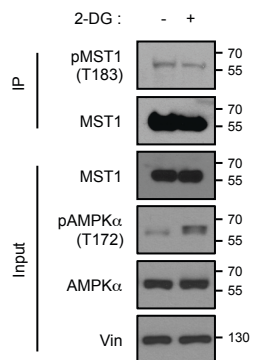

Supplement: NIHMS656226-supplement-3.pdf [file NIHMS656226-supplement-3.pdf]

# Figure S3

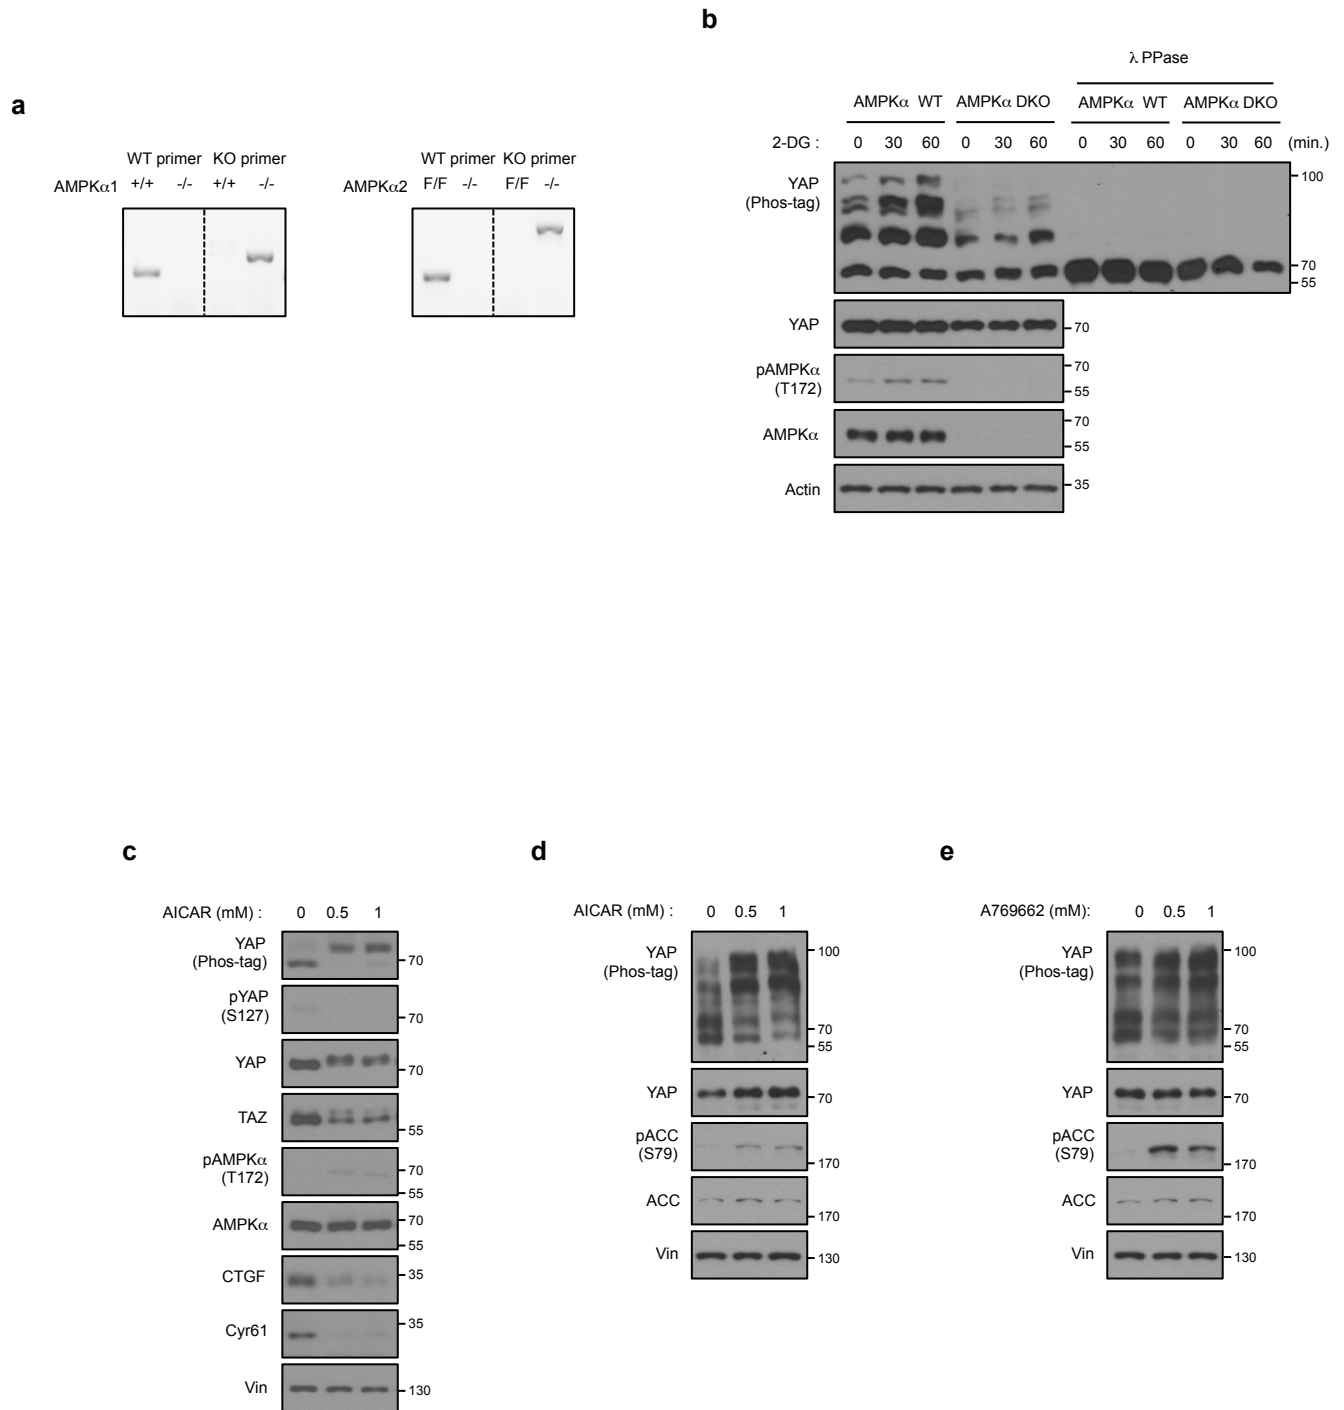

Supplement: NIHMS656226-supplement-4.pdf [file NIHMS656226-supplement-4.pdf]
